# Supplementary material for: Uncovering molecular events associated with the chemosuppressive effects of flaxseed: a microarray analysis of the laying hen model of ovarian cancer
Source: PubMed Central journal article supplement (PMC4158050; doi:10.1186/1471-2164-15-709), 2014-08-24

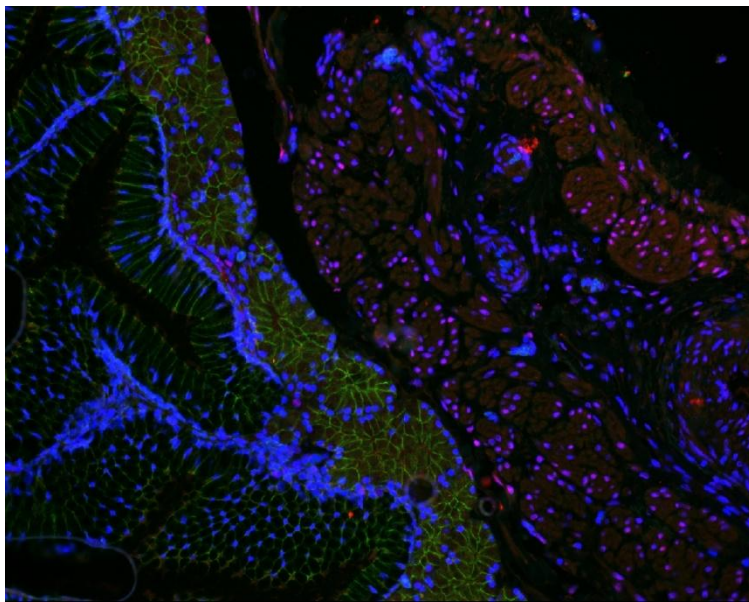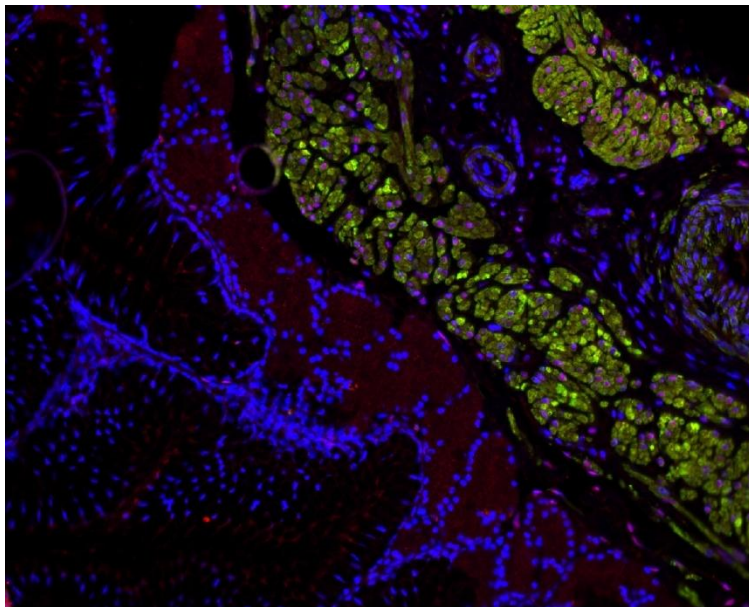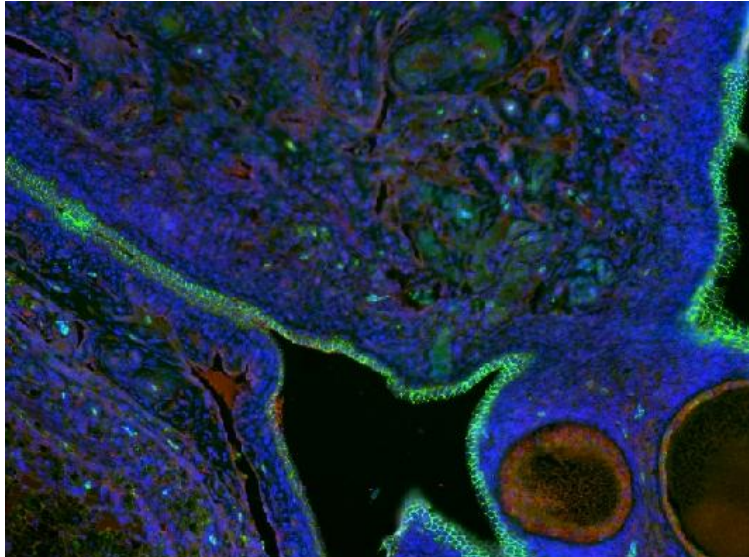

Supplement: 12864_2013_6405_MOESM3_ESM.pdf [file 12864_2013_6405_MOESM3_ESM.pdf]
